# Supplementary material
Source: MDPI journal article supplement (https://www.mdpi.com/2076-3417/7/1/101)
Supplement: s1 [file s1]

# Supplementary Materials: Use of Ferritin-Based Metal-Encapsulated Nanocarriers as Anticancer Agents

Luciana Mosca, Elisabetta Falvo, Pierpaolo Ceci, Elena Poser, Ilaria Genovese, Giulia Guarguaglini and Gianni Colotti

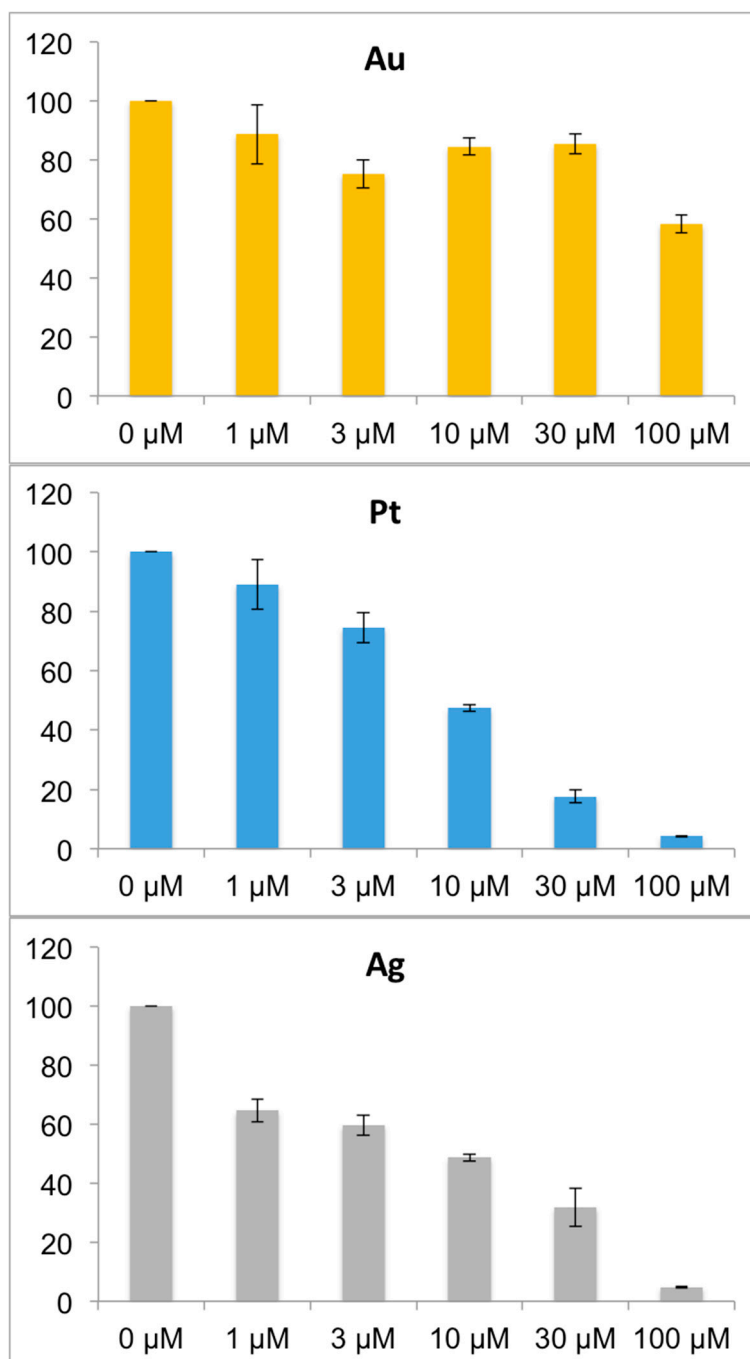

**Figure S1.** Cell viability assay on SH-SY5Y cells upon exposure to cytotoxic metals:  $\text{AuCl}_3$  (Au); cisPt (Pt) and  $\text{AgNO}_3$  (Ag). Forty-eight hours of treatment with different concentrations of metals was assayed. For each experimental condition, viability percentage with respect to control is shown. Each point represents the mean value of eight different experimental points. Standard errors are indicated.
